# Supplementary material
Source: Research Square preprint supplement (doi:10.21203/rs.3.rs-9245212/v1)
Supplement: Supplementary file 1 [file f639ba2ad9ca48eb9d9fbbf6.docx]

**Table s1.** Sensitivity Analyses for the Association Between Grandparenting and Cognitive Function Across Different Samples

| Sample | *β* | *p* value | Significant Association | Mediation Effect Significant |
| --- | --- | --- | --- | --- |
| Respondents who reported any engagement in grandparenting | 0.27 | 0.003 | Yes | Yes |
| Respondents with at least one grandchild | -0.45 | 0.044 | Yes | Yes |
